# Supplementary material
Source: Springer Nature journal article supplement (https://www.springermedizin.de/resource/supplementary/12986_2007_114_MOESM8_ESM.pdf/25655390)
Supplement: MOESM8 [file 25655390]

**Caucasian +Black +Hispanic**

**Males: Fat Fraction < 0.15**



**Females: Fat Fraction < 0.24**
